# Supplementary material
Source: Springer Nature journal article supplement (http://www.springermedizin.de/resource/supplementary/12891_2010_1079_MOESM1_ESM.pdf/9507660)

PL = Ligamentum  
patellae

L = Patella-  
länge

PL

L

PL = L  
 $\pm 20\%$

Medial

Lateral

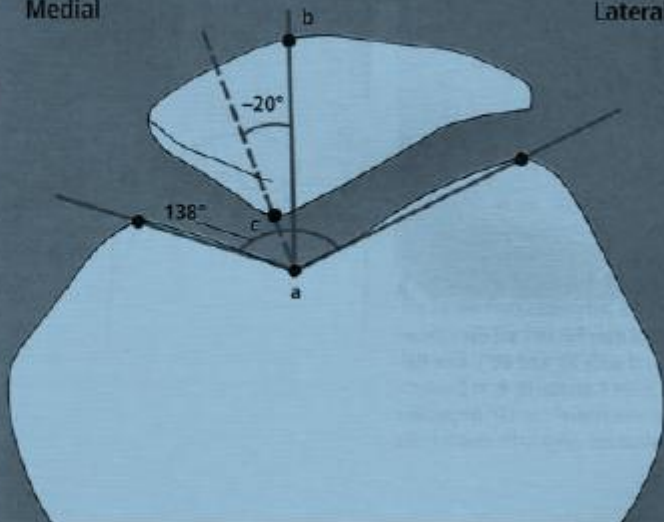

Supplement: MOESM1 [file 9507660]
